# Supplementary material for: Human Induced Pluripotent Spheroids’ Growth Is Driven by Viscoelastic Properties and Macrostructure of 3D Hydrogel Environment
Source: MDPI journal article supplement (doi:10.3390/bioengineering10121418), 2023-12-13
Supplement: s1 [file s1]

## Supplementary Materials

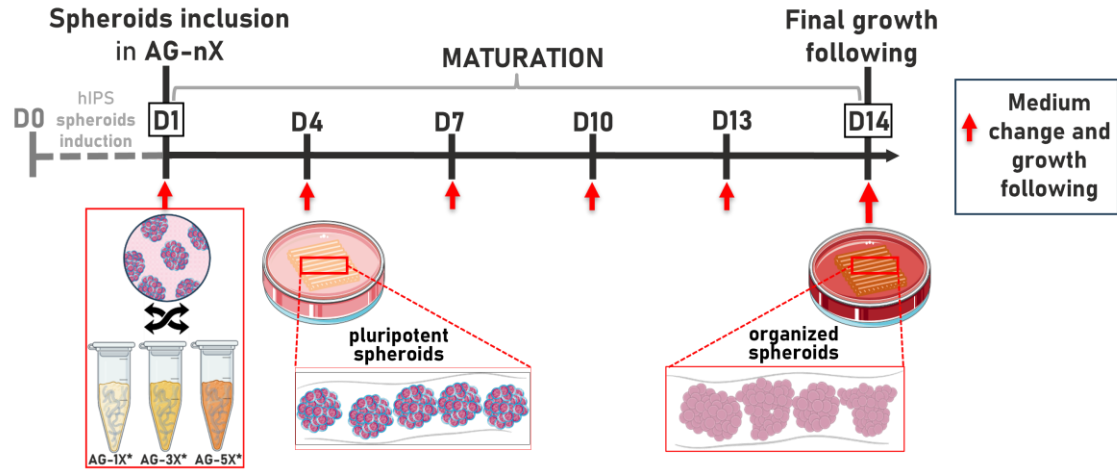

**Figure S1.** Study design, from the spheroids' induction to the final growth following.

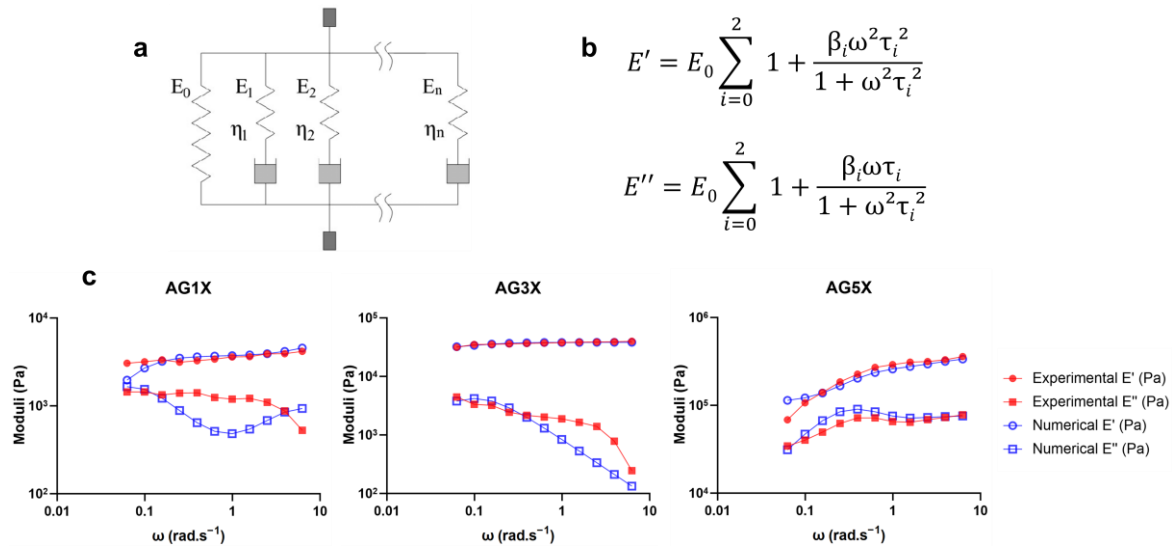

**Figure S2.** Fitting of a generalized second-order Maxwell model to experimentally measured modulus ( $E'$  and  $E''$ ) (a) Representation of measured data and calculated data with the 2nd-order Maxwell model. (b) Schematic representation of a generalized Maxwell model. (c) Equation of the  $E'$  and  $E''$  modules according to the 2nd-order Maxwell model.

**Table S1.** Parameters  $\beta$ ,  $\tau$  and  $E$  calculated for each AG-nX ( $n = 1, 3, 5$ ). Results presented as mean  $\pm$  SD (at least  $n = 3$  per condition).

|       | $\beta_1$ |     | $\tau_1$ |  | $\beta_2$ |     | $\tau_2$ |  | $E$ (kPa) |     |
|-------|-----------|-----|----------|--|-----------|-----|----------|--|-----------|-----|
|       | mean      | SD  | mean     |  | mean      | SD  | mean     |  | mean      | SD  |
| AG-1X | 0.6       | 0.3 | 0.3      |  | 1.2       | 0.3 | 3.0      |  | 1.2       | 0.8 |
| AG-3X | 0.3       | 0.2 | 0.3      |  | 0.3       | 0.0 | 3.0      |  | 38.9      | 1.4 |
| AG-5X | 0.2       | 0.0 | 0.3      |  | 0.9       | 0.4 | 3.0      |  | 110.3     | 1.7 |
